# Supplementary material
Source: publisher site journal article supplement (https://www.dovepress.com/article/429958)
Supplement: Supplementary file 1 [file get_supplementary_file.php]

***Supplementary Material***

1. **Supplementary Figure 1**
2. Prognostic analysis of CCDC103 in generalized carcinoma.


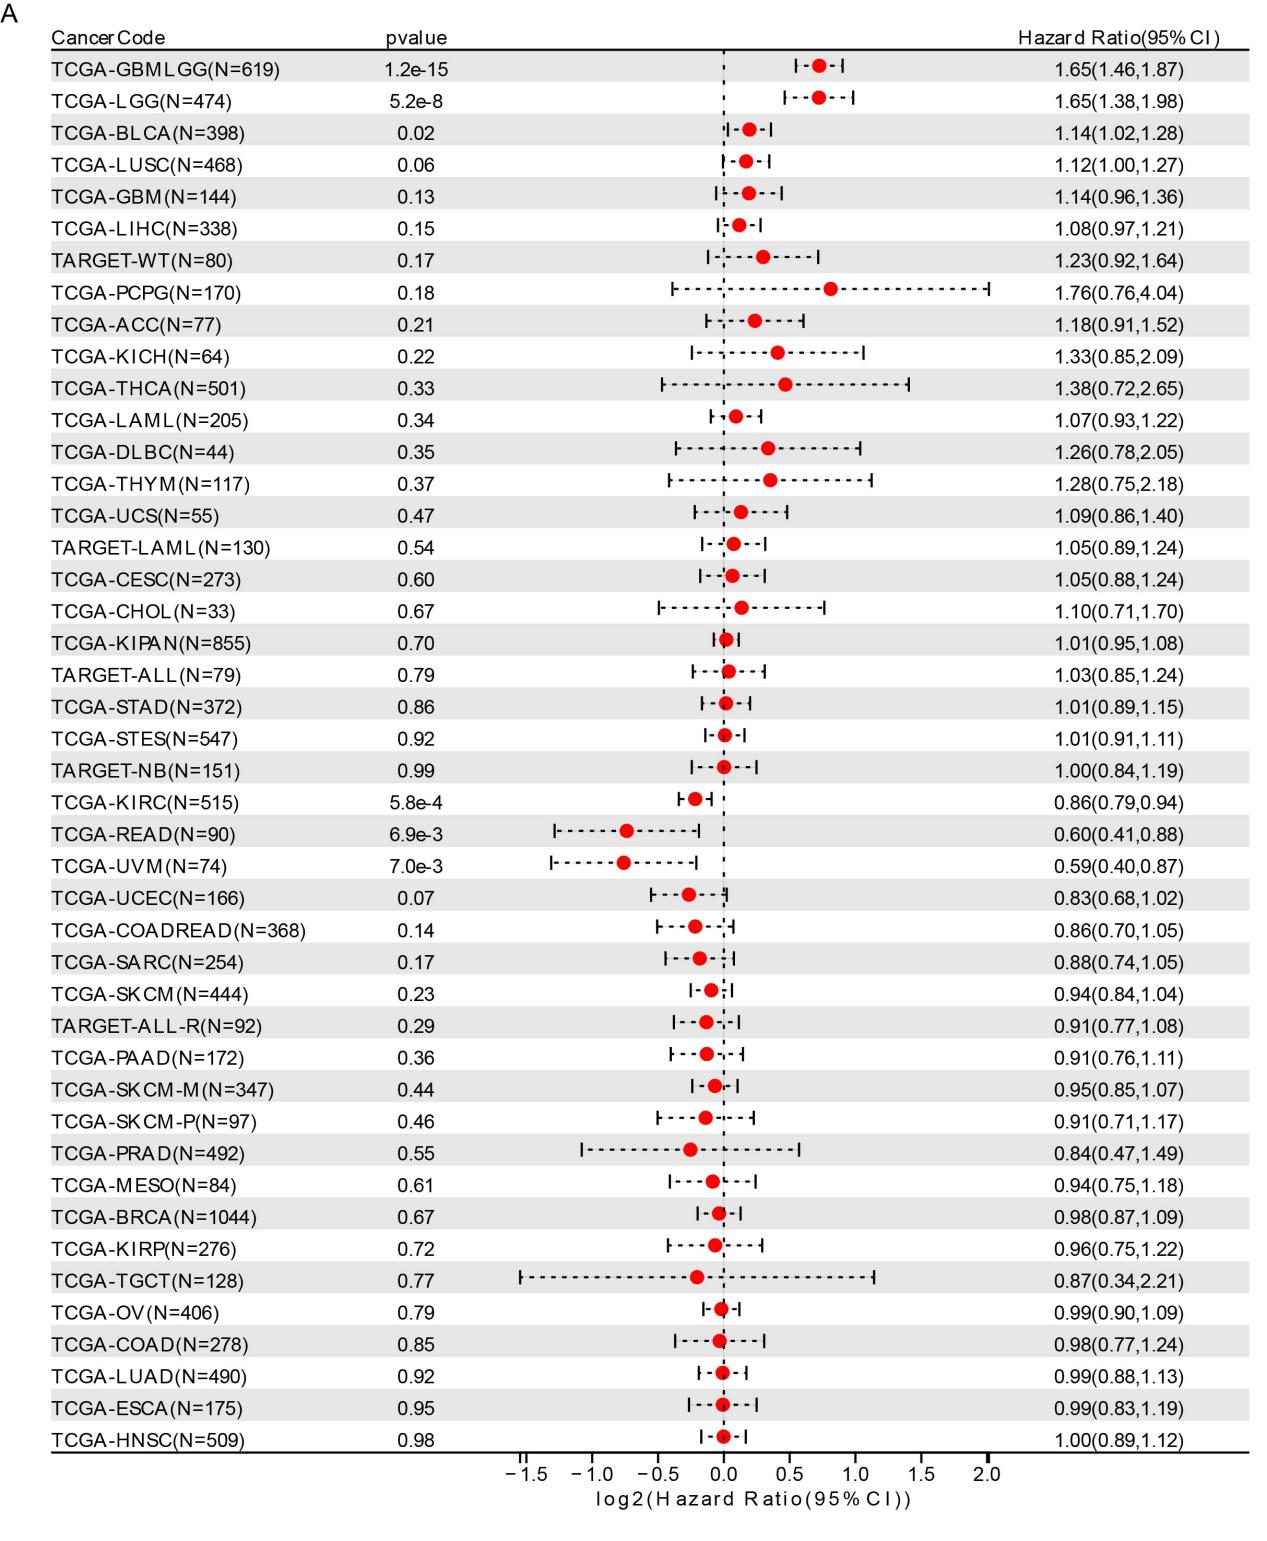


1. **Supplementary Figure 2**

**
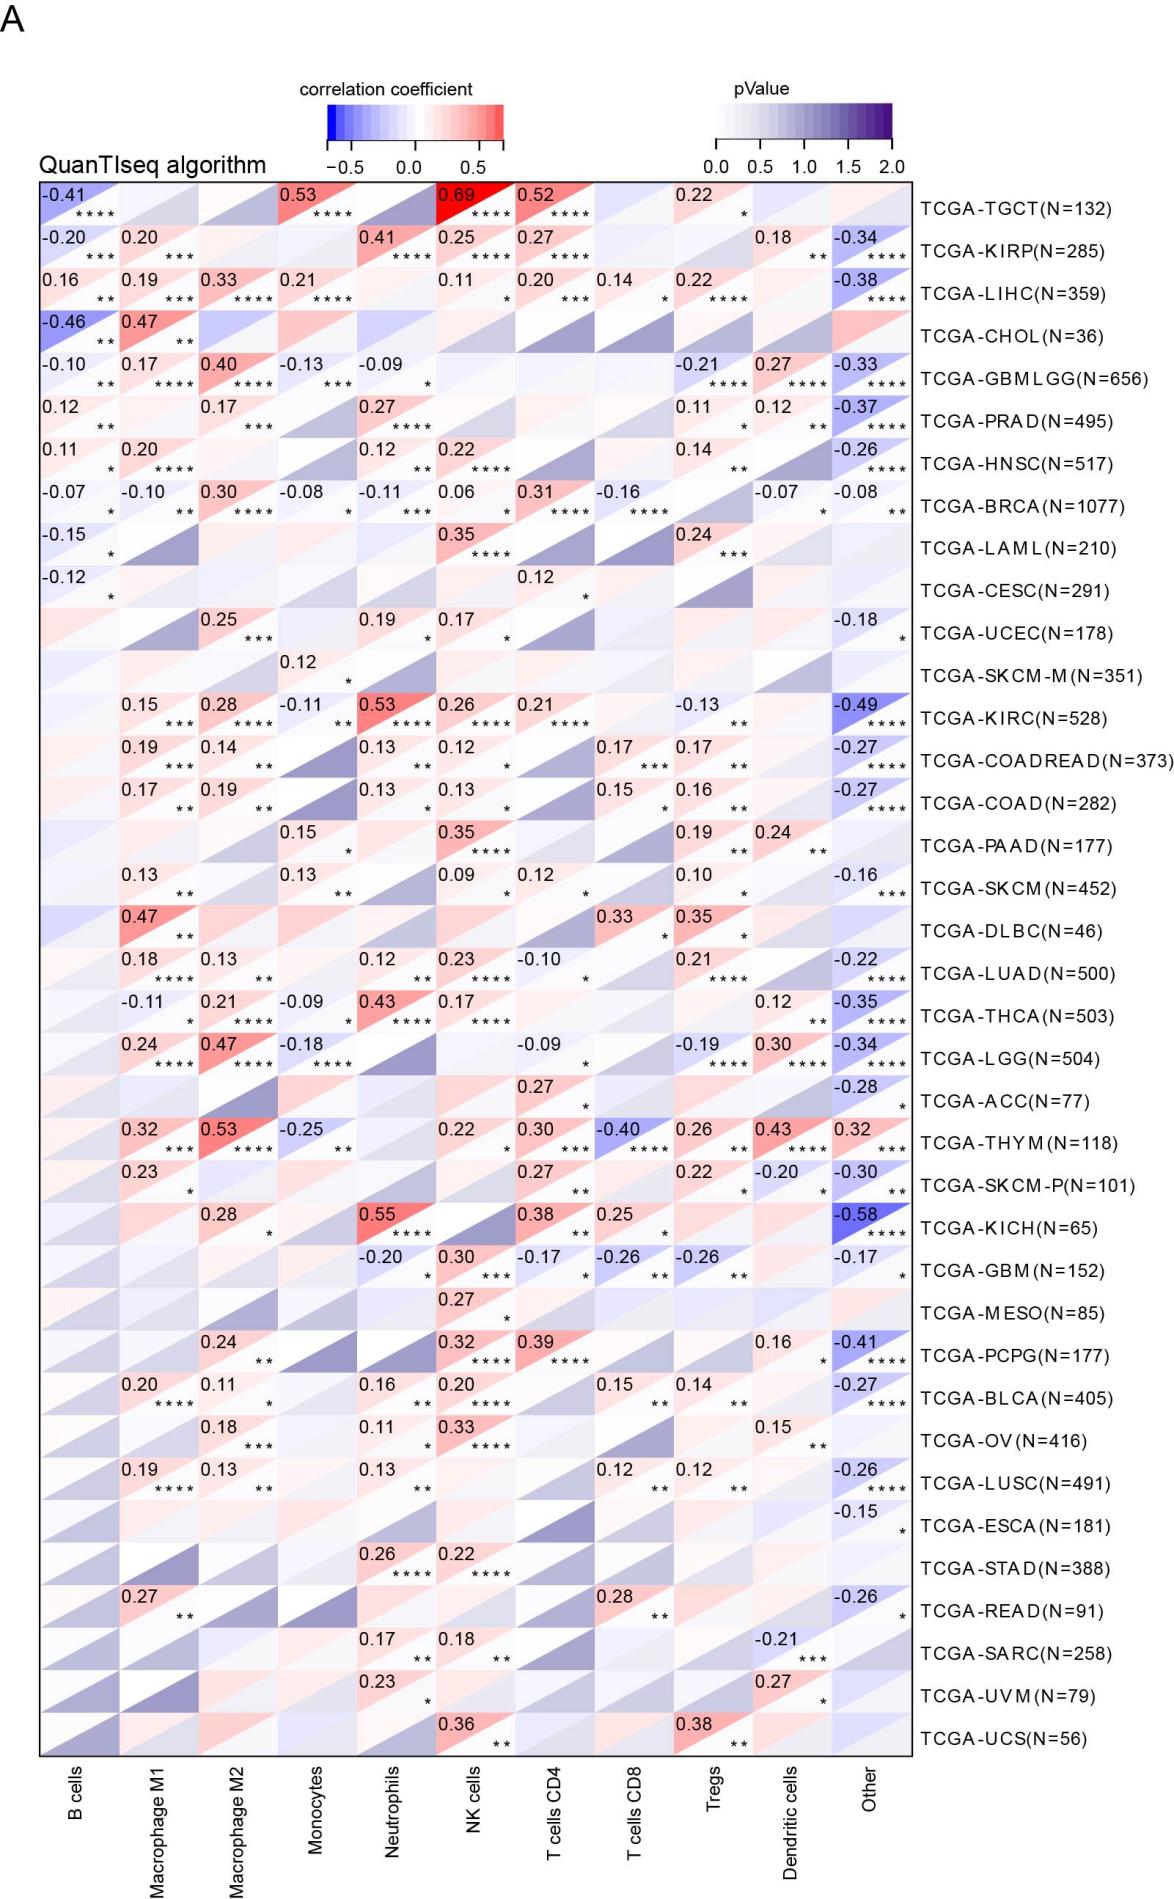
**

1. The correlation between CCDC103 and immune infiltration in generalized carcinoma was analyzed based on QuanTIseq algorithm.
2. **Supplementary Figure 3**

**
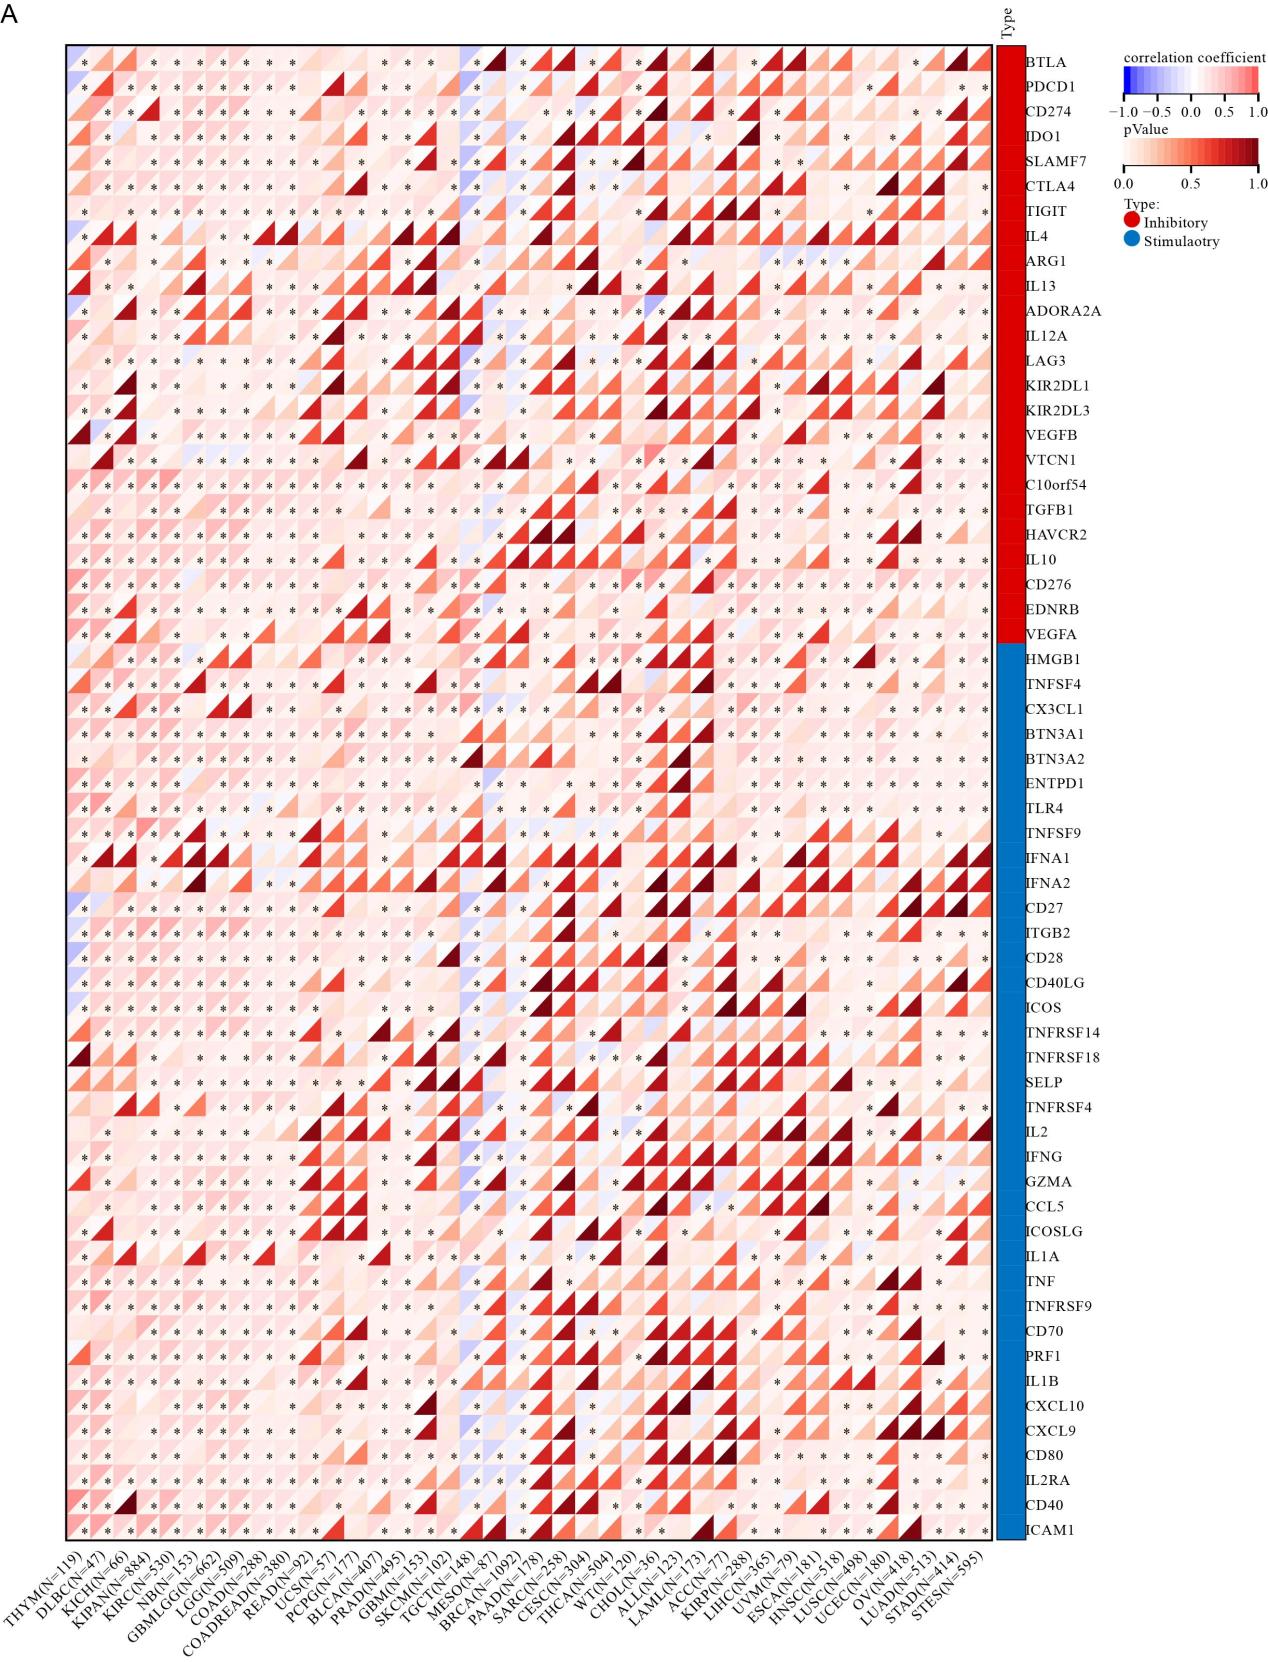
**

1. The correlation between CCDC103 and immune checkpoint molecules in generalized carcinoma.
